# Supplementary material for: Kinetic study of self-assembly of Ni(ii)-doped TiO2 nanocatalysts for the photodegradation of azo pollutants
Source: Royal Society of Chemistry journal article supplement (doi:10.1039/c5ra16172j), 2015-01-01
Supplement: c5ra16172j1.pdf [file c5ra16172j1.pdf]

## Electronic Supplementary Information

### Kinetic study of self-assembly Ni(II)-doped TiO<sub>2</sub> nanocatalysts for the photodegradation of azo pollutants

Chia-Yun Chen\* and Li-Jen Hsu

*Department of Applied Materials and Optoelectronic Engineering, National Chi Nan University, No.1, Daxue Rd., Puli Township, Nantou 545, Taiwan*

\*E-mail address: [timcychen@ncnu.edu.tw](mailto:timcychen@ncnu.edu.tw)

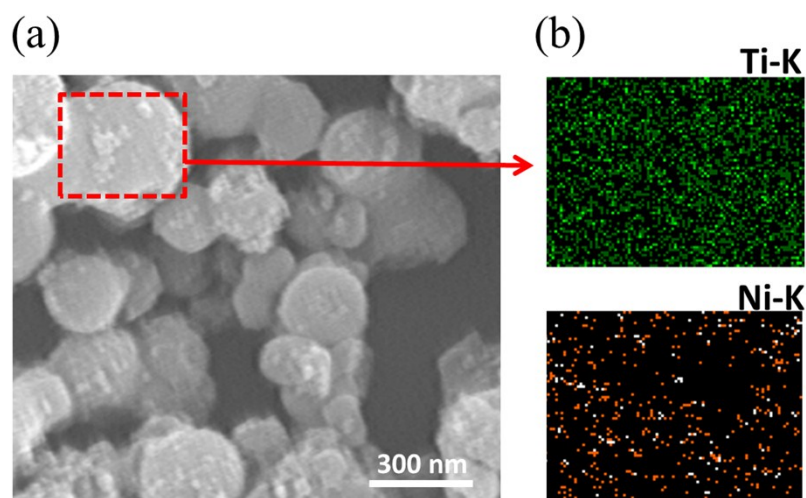

Figure S1. (a) Low-magnification SEM image and (b) EDS mapping (marked as red square in Fig. S1(a)) of 1% Ni<sup>2+</sup>-doped TiO<sub>2</sub>.

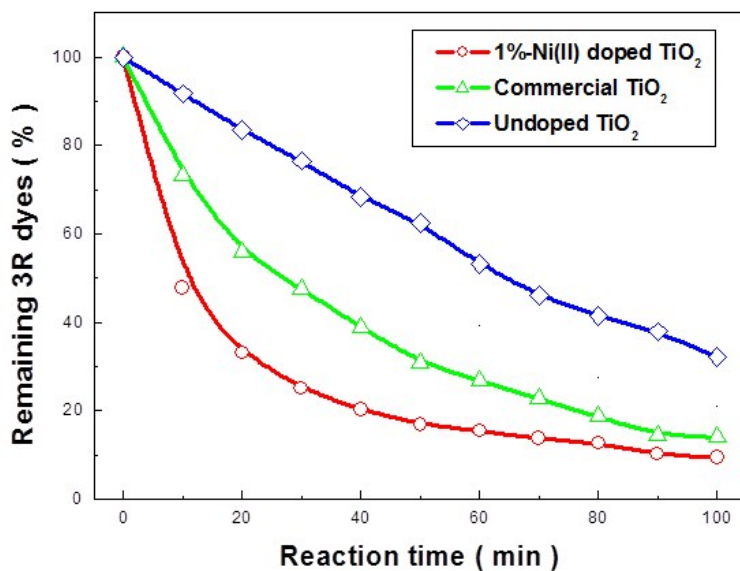

Figure S2. Kinetic photodegradation of 3R dyes in aqueous suspension in the presence of 1% Ni<sup>2+</sup>-doped, commercial (anatase TiO<sub>2</sub>, Aldrich, USA) and un-doped TiO<sub>2</sub> photocatalysts, respectively.
